# Supplementary material
Source: PubMed Central journal article supplement (PMC7062200)
Supplement: MMBR.00061-19-s0001.pdf [file MMBR.00061-19-s0001.pdf]

**Supplementary File S1: Etymology of newly proposed taxa (depicted in bold in Figure 11).** Taxa officially proposed to the International Committee on Taxonomy of Viruses (ICTV) by the authors of this article (1-4), and by now approved by the ICTV Executive Committee, are listed in alphabetical order and are bolded and color-coded as in Figure 11. Bolded taxon names from Figure 11 not in the list below have been proposed separately by others and can be found in various taxonomic proposals listed at <https://talk.ictvonline.org/files/proposals/>

- **Algavirales**: after alga and the suffix -virales for order taxa
- **Allassoviricetes**: from Greek ἀλλάσσω [alláссо] meaning mutate (refers to the high mutation rate of levivirids); the suffix -viricetes denotes class taxa
- **Alsuviricetes**: consists of a portmanteau of “alphavirus supergroup” and the suffix -viricetes for class taxa
- **Amabiliviricetes**: after Zulu amabili meaning twenty. Twenty refers to W/20S RNA of baker’s yeast (*Saccharomyces cerevisiae*), which is an RNA-directed RNA polymerase (5, 6); the suffix -viricetes denotes class taxa
- **Amarillovirales**: from Spanish amarillo meaning yellow (refers to yellow fever virus); the suffix -virales denotes order taxa
- **Artverviricota**: consists of a portmanteau of reverse transcriptase read backwards and the suffix -viricota for phylum taxa
- **Asfuvirales**: consists of a portmanteau of Asfarviridae and “faustovirus,” a likely member of the order together with “pacmanviruses” and “kaumoebaviruses,” and the suffix -virales for order taxa
- **Bamfordvirae**: after Dennis Bamford who first promoted the evolutionary unity of all DJR-MCP viruses (7, 8); the suffix -virae denotes kingdom taxa
- **Belfryvirales**: from belfry, a tower (turret) that contains a bell; the suffix -virales denotes order taxa
- **Blubervirales**: in honor of Barry Blumberg† for his role in hepatitis B research (9); the suffix -virales denotes order taxa
- **Caudoviricetes**: derived from Latin caudo, meaning tail. Tail refers to the current order *Caudovirales*, which will likely be reorganized (and its name dissolved) in the near future; the suffix -viricetes denotes class taxa
- **Chitovirales**: to honor the suggested name for a higher-rank taxon for poxviruses proposed by Lwoff and Tournier in 1966 (“Chitovirales” from Greek χιτών [khitōn], a specific garment and a reference to the morphological structure of poxviruses) for the “LHT system” (10-12); the suffix -virales denotes order taxa
- **Chrymotiviricetes**: a portmanteau of chrysovirus, megabirnavirus, and totivirus; the suffix -viricetes denotes class taxa
- **Cossaviricota**: after Yvonne Cossart†, who co-discovered parvovirus B19 (13); the suffix -viricota denotes phylum taxa
- **Cryppavirales**: a portmanteau of Cryphonectra parasitica, the species of the fungus in which the first mitovirus was discovered; the suffix -virales denotes order taxa
- **Dividoviricota**: from Esperanto divido, meaning division. Division refers to the “split” double jelly roll (two vertical single jelly rolls) major capsid protein encoded by viruses in this taxon; the suffix -viricota denotes phylum taxa

- **Duplodnaviria**: a portmanteau of Latin *dūplō*, meaning double, and *DNA*, (refers to double-stranded dsDNA genomes); the suffix *-viria* denotes realm taxa
- **Duplopiviricetes**: a portmanteau of Italian *duplo* meaning double (refers to double-stranded RNA) and the first two letters of *picobirnaviruses*; the suffix *-viricetes* denotes class taxa
- **Duplornaviricota**: a portmanteau of Italian *duplo* meaning double (refers to double-stranded RNA), and *RNA*; the suffix *-viricota* denotes phylum taxa
- **Durnavirales**: a portmanteau of Italian *duplo* meaning double (double refers to double-stranded RNA) and *RNA*; the suffix *-virales* denotes order taxa
- **Faserviricetes**: after German *Faser*, meaning fiber (a reference to *Inoviridae*, which is derived from Greek *ίνα* [ína]) and the suffix *-viricetes* for class taxa
- **Flasuviricetes**: consists of a portmanteau of “*flavivirus supergroup*” and the suffix *-viricetes* for class taxa
- **Ghabrivirales**: in honor of the late Said Ghabrial<sup>†</sup>, a pioneer in study of the viruses in this order and former ICTV Subcommittee Chair for Fungal and Protist viruses; the suffix *-virales* denotes order taxa
- **Halopanivirales**: a portmanteau of *Haloarcula hispanica*, the host of founding member “archaeal virus SH1” of this clade (14); the suffix *-virales* denotes order taxa
- **Haloruvirales**: after *Halorubrum* pleomorphic virus 1 (HRPV-1, member of the type species of *Alphapleolipovirus*, *Pleolipoviridae*) and the suffix *-virales* for order taxa
- **Helvetiavirae**: from Latin *helvetia* meaning Swiss, a reference to the Swiss rolls (an alternative name for jelly roll. Jelly roll refers to the jelly roll fold of the capsid proteins of viruses in this taxon); the suffix *-virae* denotes kingdom taxa
- **Hepelivirales**: consists of a portmanteau of *hepevirus-like* and the suffix *-virales* for order taxa
- **Herviviricetes**: from *herpesvirus* and the suffix *-viricetes* for class taxa
- **Heunggongvirae**: from Cantonese 香港 [*Hēunggóng*], meaning (and approximately pronounced) Hong Kong. Hong Kong refers to *Escherichia coli* phage HK97, the founding member of the HK97 [Hong Kong 97]-fold major capsid protein of viruses in this taxon; the suffix *-virae* denotes kingdom taxa
- **Hofneiviricota**: after Peter H. Hofschneider<sup>†</sup>, who described “phage M13” in 1963 (15) and the suffix *-viricota* for phylum taxa
- **Howeltoviricetes**; after *Howell Township*, New Jersey, USA, where a fungus (*Cryphonectria parasitica*) was isolated that was infected with the type mitovirus (16); the suffix *-viricetes* denotes class taxa
- **Huolimaviricetes**; after Finnish *huolimaton*, meaning sloppy (refers to the “sloppy” assembly of pleolipovirions (17)); the suffix *-viricetes* denotes class taxa
- **Imitervirales**: from French *imiter*, meaning to mimic (refers to mimiviruses [*microbe-imitating*]); the suffix *-virales* denotes order taxa
- **Kalamavirales**: after *Kalamazoo*, USA, where *Pseudomonas* phage PRD1 (*Tectiviridae*: *Alphatectivirus*) was first isolated (18); the suffix *-virales* denotes order taxa
- **Kitrinoviricota**: after Greek *κίτρινος* [*kitrinos*] meaning yellow (refers to yellow fever virus); the suffix *-viricota* denotes phylum taxa

- **Laserviricetes**: consists of a portmanteau of Serpentine Lake, Rottneest Island, Western Australia, Australia, where the first virus of this taxon, “archaeal virus SH1” was discovered (14); the suffix *-viricetes* denotes class taxa
- **Lenarviricota**: consists of a portmanteau of Leviviridae and Narnaviridae and the suffix *-viricota* for phylum taxa
- **Levivirales**: after Leviviridae, assuming that Leviviridae will have to be promoted shortly to accommodate the rapidly expanding diversity of this taxon; the suffix *-virales* denotes order taxa
- **Loebvirae**: after T. Loeb<sup>†</sup>, who described “phage f1” in 1960 (19); the suffix *-virae* denotes kingdom taxa
- **Magsaviricetes**: from Mag 115, the original designation of Nodamura virus, and Saitama Prefecture, Japan, where studies were performed that led to the discovery of Mag 115/Nodamura virus (20); the suffix *-viricetes* denotes class taxa
- **Malgrandaviricetes**: after Esperanto malgranda, meaning micro/small and the suffix *-viricetes* for class taxa
- **Martellivirales**: a reference to G. P. Martelli, a pioneer in closterovirid research, and a long-time ICTV EC Member and two-mandate ICTV Plant Virus SC Chair; the suffix *-virales* denotes order taxa
- **Maveriviricetes**: from Maverick, a reference to maveruses that shares many features with the large, virus-like transposons of the Maverick/Polinton superfamily, and the suffix *-viricetes* for class taxa
- **Megaviricetes**: from Greek μέγας [mégas], meaning large. Large refers to the extremely long genomes of viruses in this taxon, “Megavirales” (21), a previously suggested name for this group of viruses; the suffix *-viricetes* denotes class taxa
- **Miaviricetes**: from ourmiavirus and the suffix *-viricetes* for class taxa
- **Mindivirales**: from a reference to Leonard Mindich, who contributed significantly to cystovirid research, and the suffix *-virales* for order taxa
- **Mitoviridae**: after Mitovirus and the suffix *-viridae* for family taxa
- **Monodnaviria**: consists of a portmanteau of Greek μόνος [mónos], meaning single (refers to single-stranded DNA) and DNA, and the suffix *-viria* for realm taxa
- **Mouviricetes**: after French mou, meaning flaccid (flacher) and the suffix *-viricetes* for class taxa
- **Nodamuvirales**: a contraction of Nodamura virus and the suffix *-virales* for order taxa
- **Nucleocytoviricota**: from nucleocytoplasmic large DNA viruses (NCLDVs), the current unofficial name for this group of viruses, and the suffix *-viricota* for phylum taxa
- **Orthonavirae**: from Greek ὀρθός [orthós] meaning straight and the suffix *-virae* for kingdom taxa
- **Ourlivirales**: consists of a portmanteau of ourmiavirus-like and the suffix *-virales* for order taxa
- **Papovaviricetes**: reinstates word stem papova (former “Papovaviridae,” which included both polyomaviruses and papillomaviruses); the suffix *-viricetes* denotes class taxa
- **Pararnavirae**: from Greek παρά [pará] meaning besides/next to and RNA and the suffix *-virae* for kingdom taxa
- **Patatavirales**: from Italian patata meaning potato (refers to potato virus Y) and the suffix *-virales* for order taxa

- ***Peploviricota***: to honor the name for a higher-rank taxon including herpesviruses proposed by Lwoff and Tournier in 1966 (“*Peplovirales*” from Greek πέπλος [peplos], meaning garment that refers to the unique tegument of herpesviruses) for the “LHT system” (10-12); the suffix *-viricota* denotes phylum taxa
- ***Petitivirales***: from French *petit*, meaning small (micro) and the suffix *-virales* for order taxa
- ***Phixviricota***: consists of a portmanteau of “phage ΦX174” and the suffix *-viricota* for phylum taxa
- ***Piccovirales***: from Italian *piccolo*, meaning small (parvus), and the suffix *-virales* for order taxa
- ***Pimascovirales***: consists of a portmanteau of *pitho-*, *irido-*, *marseille-*, and *ascoviruses*, and the suffix *-virales* for order taxa
- ***Pisoniviricetes***: consists of a portmanteau of the names of the founding orders (*Picornavirales*, *Sobelivirales*, *Nidovirales*) and the suffix *-viricetes* for class taxa
- ***Pisuviricota***: consists of a portmanteau of “*picornavirus supergroup*” and the suffix *-viricota* for phylum taxa
- ***Pokkesviricetes***: from Middle English *pokkes*, meaning pox and the suffix *-viricetes* for class taxa
- ***Polivirales***: consists of a portmanteau of *polinton-like virus* and the suffix *-virales* for order taxa
- ***Preplasmiviricota***: consists of a portmanteau of *precursor* of certain *plasmids* and the suffix *-viricota* for phylum taxa
- ***Priklausovirales***: from Lithuanian *priklausomas*, meaning dependent, a tongue-in-cheek reference to the included family *Lavidaviridae* (*large virus dependent associated*); the suffix *-virales* denotes order taxa
- ***Quintoviricetes***: after Galician *quinto*, meaning fifth (a reference to Fifth disease, a disease caused by parvovirus B19), and the suffix *-viricetes* for class taxa
- ***Reovirales***: after *Reovirales*, assuming that *Reoviridae* will have to promote shortly to accommodate the rapidly expanding diversity of this taxon; the suffix *-virales* denotes order taxa
- ***Resentoviricetes***: derived from *respiratory enteric orphan* (also the phrase that gave rise to the word stem *reo* in reoviruses) and the suffix *-viricetes* for class taxa
- ***Revtraviricetes***: consists of a portmanteau of *reverse transcriptase* and the suffix *-viricetes* for class taxa
- ***Rowavirales***: after Wallace P. *Rowe*<sup>†</sup>, one of the co-discoverers of adenovirids in 1953 (22); the suffix *-virales* denotes order taxa
- ***Saleviricota***: after Italian *sale*, meaning salt (refers to the halophilic hosts of most pleolipovirids); the suffix *-viricota* denotes phylum taxa
- ***Sangervirae***: after Frederick *Sanger*<sup>†</sup>, who used “phage ΦX174” to determine the first-ever DNA genome sequence (23), and the suffix *-virae* for kingdom taxa
- ***Sepolyvirales***: after *SE* [Stewart & Eddy] *polyoma*, the first designation for the first discovered polyomavirus (now murine polyomavirus); the suffix *-virales* denotes order taxa
- ***Shotokuvirae***; after Japanese Empress *Shōtoku* (称徳天皇), aka *Kōken* (孝謙天皇)<sup>†</sup>, who wrote a poem that is possibly the first written record about a plant disease that was

likely caused by a geminivirus (CRESS-DNA virus) (24); the suffix *-virae* denotes kingdom taxa

- ***Sinhaliviridae***: consists of a portmanteau of *Sinaivirus* and *Halictivirus* and the suffix *-viridae* for family taxa
- ***Sobelivirales***: consists of a portmanteau of *sobemovirus-like* and the suffix *-virales* for order taxa
- ***Stellavirales***: from Latin *stella* meaning star (a reference to astroviruses; astro also means star); the suffix *-virales* denotes order taxa
- ***Stelpaviricetes***: consists of a portmanteau of the names of the founding orders (*Stellavirales*, *Patatavirales*) and the suffix *-viricetes* for class taxa
- ***Tectiliviricetes***: from *tectivirid-like* and the suffix *-viricetes* for class taxa
- ***Tolivirales***: consists of a portmanteau of *tombusvirus-like* and the suffix *-virales* for order taxa
- ***Tolucaviricetes***: consists of a portmanteau of *tombusviruses*, *luteoviruses*, and *carmotetraviruses*, and the suffix *-viricetes* for class taxa
- ***Trapavirae***: after Trapani, Italy, where Halorubrum pleomorphic virus 1 (HRPV-1, member of the type species of *Alphapleolipovirus*, *Pleolipoviridae*) was discovered (25); the suffix *-virae* denotes kingdom taxa
- ***Tubulavirales***: from *tubular*, a reference to the virion morphology of some viruses in this taxon, and the suffix *-virales* for order taxa
- ***Uroviricota***: to honor the suggested name for a higher-rank taxon for tailed phages proposed by Lwoff and Tournier in 1966 (“*Urovirales*” from Greek οὐρά [ourá/uros, meaning tail) for the “LHT system” (10-12); the suffix *-viricota* denotes phylum taxa
- ***Varidnaviria***: consists of a portmanteau of *various DNA* viruses and the suffix *-viria* for realm taxa
- ***Vidaverviricetes***: in honor of Anne K. Vidaver, who co-discovered Pseudomonas phage phi6 (26); the suffix *-viricetes* denotes class taxa
- ***Vinavirales***; named after Viña del Mar, Chile, where “phage PM2” was first isolated (27); the suffix *-virales* denotes order taxa
- ***Wolframvirales***: a tongue-in-cheek reference to the element *wolfram* (W). The type narnavirus was found after sequencing “W dsRNA” in baker’s yeast (*Saccharomyces cerevisiae*); the suffix *-virales* denotes order taxa
- ***Zurhausenvirales***: to honor Harald *zur Hausen*, who discovered the connection of papillomaviruses and cervical cancer; the suffix *-virales* denotes order taxa

## REFERENCES

1. Koonin EV, Dolja VV, Krupovic M, Varsani A, Wolf YI, Yutin N, Zerbini M, Kuhn JH. 2019. Create a megataxonomic framework, filling all principal taxonomic ranks, for realm *Riboviria*. ICTV TaxoProp 2019.006G.U.v1.Riboviria. [https://talk.ictvonline.org/files/proposals/taxonomy\\_proposals\\_general1/m/gen02/9305](https://talk.ictvonline.org/files/proposals/taxonomy_proposals_general1/m/gen02/9305).
2. Koonin EV, Dolja VV, Krupovic M, Varsani A, Wolf YI, Yutin N, Zerbini M, Kuhn JH. 2019. Create a megataxonomic framework, filling all principal taxonomic ranks, for ssDNA viruses. ICTV TaxoProp 2019.005G.U.v1.Monodnaviria. [https://talk.ictvonline.org/files/proposals/taxonomy\\_proposals\\_general1/m/gen02/9303](https://talk.ictvonline.org/files/proposals/taxonomy_proposals_general1/m/gen02/9303).
3. Koonin EV, Dolja VV, Krupovic M, Varsani A, Wolf YI, Yutin N, Zerbini M, Kuhn JH. 2019. Create a megataxonomic framework, filling all principal taxonomic ranks, for DNA viruses encoding vertical jelly roll-type major capsid proteins. ICTV TaxoProp 2019.003G.U.v1.Varidnaviria. [https://talk.ictvonline.org/files/proposals/taxonomy\\_proposals\\_general1/m/gen02/9299](https://talk.ictvonline.org/files/proposals/taxonomy_proposals_general1/m/gen02/9299).
4. Koonin EV, Dolja VV, Krupovic M, Varsani A, Wolf YI, Yutin N, Zerbini M, Kuhn JH. 2019. Create a megataxonomic framework, filling all principal/primary taxonomic ranks, for dsDNA viruses encoding HK97-type major capsid proteins. ICTV TaxoProp 2019.004G.U.v1.Duplodnaviria. [https://talk.ictvonline.org/files/proposals/taxonomy\\_proposals\\_general1/m/gen02/9301](https://talk.ictvonline.org/files/proposals/taxonomy_proposals_general1/m/gen02/9301).
5. Matsumoto Y, Wickner RB. 1991. Yeast 20 S RNA replicon. Replication intermediates and encoded putative RNA polymerase. *J Biol Chem* 266:12779-83.
6. Rodriguez-Cousino N, Esteban LM, Esteban R. 1991. Molecular cloning and characterization of W double-stranded RNA, a linear molecule present in *Saccharomyces cerevisiae*. Identification of its single-stranded RNA form as 20 S RNA. *J Biol Chem* 266:12772-8.
7. Bamford DH. 2003. Do viruses form lineages across different domains of life? *Res Microbiol* 154:231-6.
8. Bamford DH, Burnett RM, Stuart DI. 2002. Evolution of viral structure. *Theor Popul Biol* 61:461-70.
9. Block TM, Alter HJ, London WT, Bray M. 2016. A historical perspective on the discovery and elucidation of the hepatitis B virus. *Antiviral Res* 131:109-23.
10. Lwoff A. 1967. Principles of classification and nomenclature of viruses. *Nature* 215:13-4.
11. Lwoff A, Horne RW, Tournier P. 1962. Un système des virus. *C R Hebd Séances Acad Sci* 254:4225-7.
12. Lwoff A, Tournier P. 1966. The classification of viruses. *Annu Rev Microbiol* 20:45-74.
13. Cossart YE, Field AM, Cant B, Widdows D. 1975. Parvovirus-like particles in human sera. *Lancet* 1:72-3.
14. Porter K, Kukkaro P, Bamford JK, Bath C, Kivela HM, Dyal-Smith ML, Bamford DH. 2005. SH1: A novel, spherical halovirus isolated from an Australian hypersaline lake. *Virology* 335:22-33.
15. Hofschneider P. 1963. Untersuchungen über "kleine" E. coli K12 Bacteriophagen. 1 und 2 Mitteilung. *Z Naturforsch* 18 b:203-205.
16. Polashock JJ, Hillman BI. 1994. A small mitochondrial double-stranded (ds) RNA element associated with a hypovirulent strain of the chestnut blight fungus and ancestrally related to yeast cytoplasmic T and W dsRNAs. *Proc Natl Acad Sci U S A* 91:8680-4.

17. Pietilä MK, Atanasova NS, Manole V, Liljeroos L, Butcher SJ, Oksanen HM, Bamford DH. 2012. Virion architecture unifies globally distributed pleolipoviruses infecting halophilic archaea. *J Virol* 86:5067-79.
18. Olsen RH, Siak J-S, Gray RH. 1974. Characteristics of PRD1, a plasmid-dependent broad host range DNA bacteriophage. *J Virol* 14:689-99.
19. Loeb T. 1960. Isolation of a bacteriophage specific for the F plus and Hfr mating types of *Escherichia coli* K-12. *Science* 131:932-3.
20. Scherer WF, Hurlbut HS. 1967. Nodamura virus from Japan: a new and unusual arbovirus resistant to diethyl ether and chloroform. *Am J Epidemiol* 86:271-85.
21. Colson P, de Lamballerie X, Fournous G, Raoult D. 2012. Reclassification of giant viruses composing a fourth domain of life in the new order *Megavirales*. *Intervirology* 55:321-32.
22. Rowe WP, Huebner RJ, Gilmore LK, Parrott RH, Ward TG. 1953. Isolation of a cytopathogenic agent from human adenoids undergoing spontaneous degeneration in tissue culture. *Proc Soc Exp Biol Med* 84:570-3.
23. Sanger F, Air GM, Barrell BG, Brown NL, Coulson AR, Fiddes CA, Hutchison CA, Slocombe PM, Smith M. 1977. Nucleotide sequence of bacteriophage phi X174 DNA. *Nature* 265:687-95.
24. Saunders K, Bedford ID, Yahara T, Stanley J. 2003. Aetiology: the earliest recorded plant virus disease. *Nature* 422:831.
25. Pietilä MK, Roine E, Paulin L, Kalkkinen N, Bamford DH. 2009. An ssDNA virus infecting archaea: a new lineage of viruses with a membrane envelope. *Mol Microbiol* 72:307-19.
26. Vidaver AK, Koski RK, Van Etten JL. 1973. Bacteriophage phi6: a lipid-containing virus of *Pseudomonas phaseolicola*. *J Virol* 11:799-805.
27. Espejo RT, Canelo ES. 1968. Properties of bacteriophage PM2: a lipid-containing bacterial virus. *Virology* 34:738-47.
